# Supplementary material for: The role of polymer–solvent interactions in polyvinyl-alcohol dispersions of multi-wall carbon nanotubes: from coagulant to dispersant
Source: Royal Society of Chemistry journal article supplement (doi:10.1039/c8sm01866a), 2018-11-05
Supplement: c8sm01866a1.pdf [file c8sm01866a1.pdf]

Electronic Supplementary material

## The role of polymer-solvent interactions in Polyvinyl- alcohol dispersions of Multi-wall carbon Nanotubes: from coagulant to dispersant

Efrat Ziv<sup>1#</sup>, David Attia<sup>1#</sup>, Gleb Vasilyev<sup>2</sup>, Orit Mendelson<sup>3</sup>, Eyal Zussman<sup>2</sup> and Rachel Yerushalmi – Rozen<sup>1,4\*</sup>

1. Department of Chemical Engineering, The Ben-Gurion University of the Negev, 84105 Beer-Sheva, Israel
2. NanoEngineering Group, Faculty of Mechanical Engineering, Technion – Israel Institute of Technology, 32000 Haifa, Israel.
3. Department of Chemistry, Nuclear Research Center-Negev, Beer-Sheva, 84190, Israel.
4. The Ilse Katz Institute for Nanoscience and Technology, The Ben-Gurion University of the Negev, 84105 Beer-Sheva, Israel

# Equal contribution

\*Correspondence to: Rachel Yerushalmi – Rozen [rachely@bgu.ac.il](mailto:rachely@bgu.ac.il)

Stable dispersions of MWNTs could not be obtained via sonication in aqueous solutions of PVA. PVA polymers of different molecular weights and degree of hydration were tested (see Table S1).

**Table S1: Unsuccessful attempts to disperse MWNTs in aqueous solutions of PVA**

| # | CNT type | PVA Mw [g/mol] | PVA Concentration [wt%] | CNT Concentration [mg/ml] |
|---|----------|----------------|-------------------------|---------------------------|
| 1 | NTX4     | PVA 10-80      | 1-10                    | 0.5-2                     |
| 3 | NTX4     | PVA 23-98      | 1-5                     | 1                         |
| 5 | INP      | PVA 10-80      | 1-10                    | 0.5-2                     |
| 6 | INP      | PVA 85-97      | 5                       | 1                         |

Stable dispersions of Carbon Black (CB) were obtained by sonication of the dry powder in aqueous solutions of PVA.

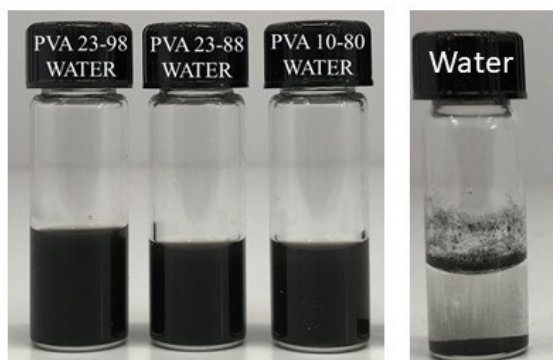

**Figure S1.** Left: CB (1 mg/ml) dispersions in 5 wt% PVA 23-98, PVA 23-88 and PVA10-80 solutions in water, following 6 weeks incubation. The dispersions were stable for at least 3 months and aggregation was not observed. Right: CB powder (1 mg/ml) in water.

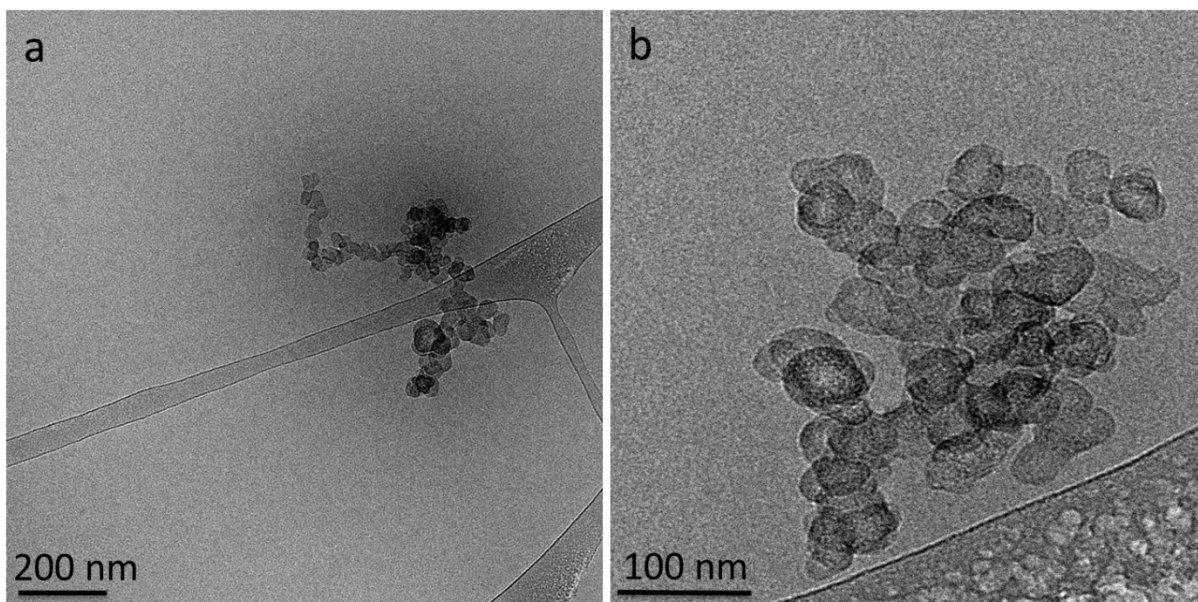

**Figure S2.** Cryo-TEM of CB (1 mg/ml) dispersion in PVA 10-80 solution in water (5 wt%).

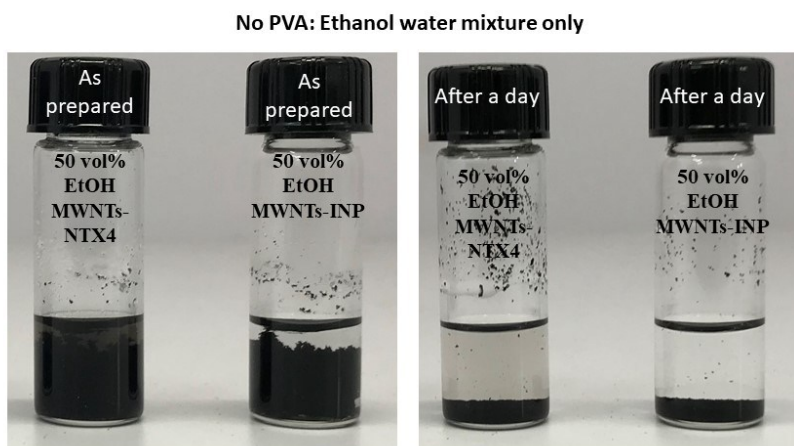

**Figure S3.** Image of vials containing powders of MWNTs (2 mg/ml) in 50:50 EtOH: water liquid mixtures. Left: immediately after sonication for 120 minutes, following the the protocol described in the experimental part. Right: after a day. Similar images were obtained after centrifugation in 30,000g for 20 minutes.

In figure S3 we present the results of a control experiment: in this experiments powders of MWNTs (NTX4 and INP) were sonicated in a liquid mixture containing 50vol% EtOH but no PVA. The images clearly show that sonication does not lead to the formation of dispersions (left). Furthermore after incubation at ambient conditions of centrifugation the non-dispersed MWNTs settle to the bottom of the vial.

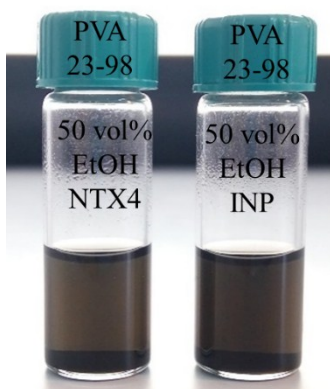

**Figure S4.** MWNTs-NTX4 (left) and MWNTs-INP (right) powders after prolonged sonication in solutions containing 1%wt PVA with a high degree of hydrolysis (98%), designated PVA 23-98 (see Table 1), in EtOH:water solution (50:50 vol%).

In Figure S4 we present the effect of EtOH on dispersion of MWNTs-NTX4 (left) and MWNTs-  
INP (right) in solutions of PVA with a high degree of hydration. Even after prolonged sonication  
most of the MWNTs powder is aggregated at the bottom of the vial.

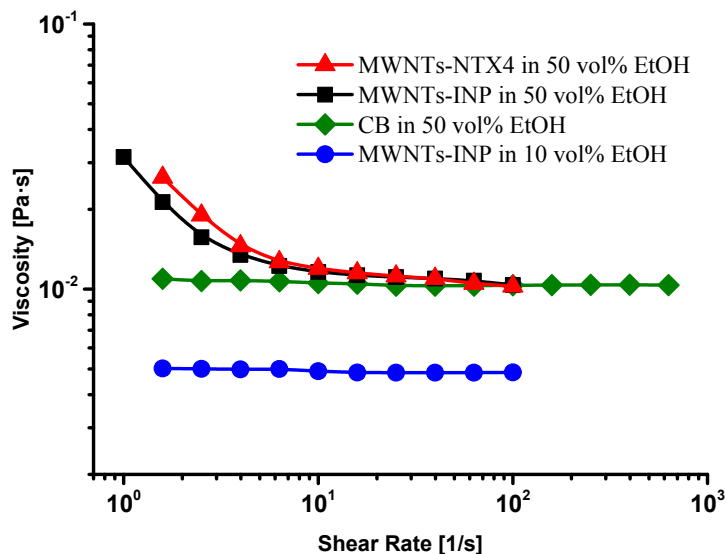

**Figure S5.** Flow curves of MWNTs and CB dispersions in PVA solutions of 5 wt% PVA10-80 in 50:50 EtOH:water liquid mixtures and (blue) 10:90 EtOH:water liquid mixture.

### Thermogravimetric Analysis (TGA).

The experiments were performed using a Mettler Toledo TGA/SDTA851e instrument. 3-17 mg of the sample were placed in an aluminum oxide pan.

Measurements were performed by heating at a constant rate of 20°C min<sup>-1</sup> from 40 to 1000°C. The measurements were carried out under a constant flow of nitrogen (200 ml min<sup>-1</sup>), in an open pan.

A reference measurement was obtained under the same conditions with an empty pan.

To test the decomposition of MWNTs-based samples measurements were carried out by heating at a rate of 20 °C min<sup>-1</sup>, from 40 to 750 °C maintaining the sample at 750 °C for 9h, and heating at a rate of 20 °C min<sup>-1</sup> from 750-1000 °C.

In Figure S6 we present the TGA curves of the different components

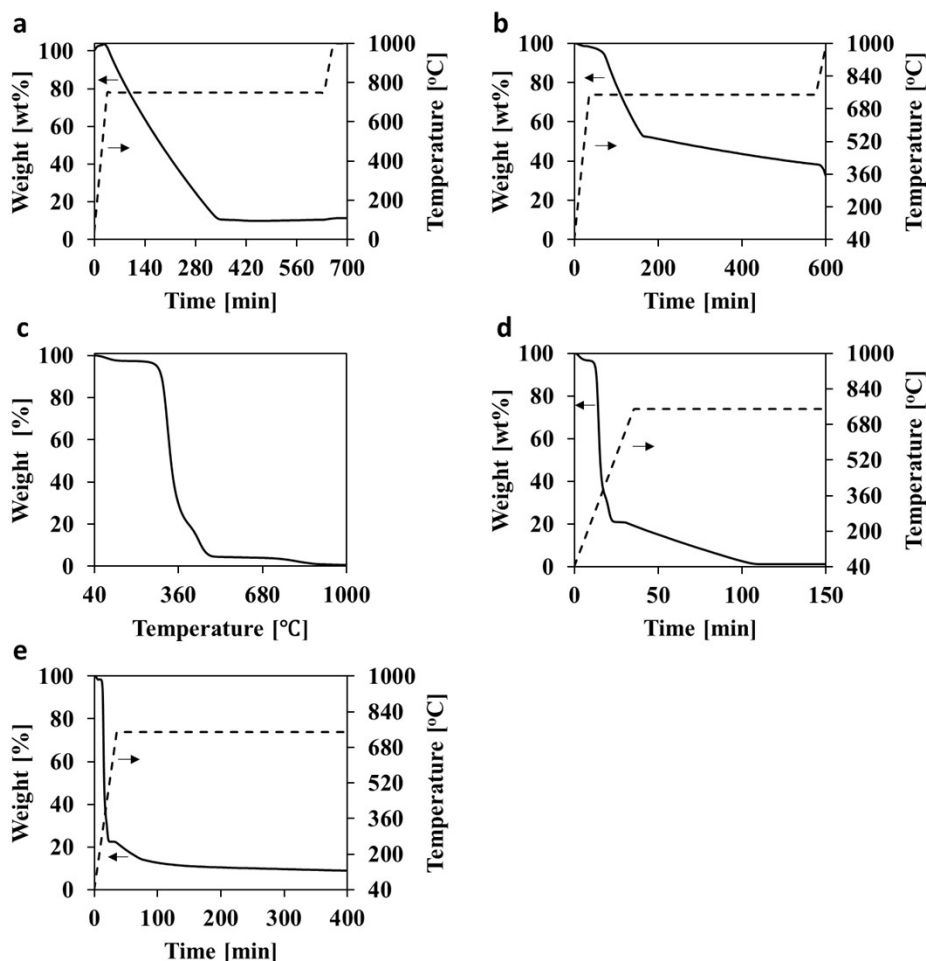

**Figure S6.** TGA curves of MWNTs powders, PVA10-80 and their mixtures (a) MWNTs-NTX4 (b) MWNTs-INP (c) PVA10-80 and (d, e) mixed powders containing 5:1 mass ratio of PVA10-80:MWNTs-NTX4 and PVA10-80:MWNTs-INP, respectively. Dashed curves outline the temperature profile as a function of time, and the continues line the weight-loss (wt%) as a function of time.

The TGA thermograms of MWNTs-NTX4 and MWNTs-INP powders show a weight loss of 94wt% and 70%, respectively (Figure S6 a, b, respectively) at 750°C (for 9h), according to reported procedure<sup>1</sup>. The TGA thermogram of PVA exhibits three main weight losses regions (Figure S6c), as reported before<sup>2</sup>, where the first weight loss at ~90°C is associated with water evaporation, the second weight loss at ~320°C is attributed to the dehydration reaction of the polymer, and the third weight loss above ~ 440°C is attributed to the decomposition of carbonaceous matter.

To calibrate the system we characterized the thermal decomposition of powder mixtures prepared at 5:1 mass ratio of PVA10-80: MWNTs-NTX4 or PVA10-80: MWNTs-INP (Figure S6d, e, respectively).

Similar measurements carried out for characterization of the dried dispersions exhibited similar curves (Figures S7-S8): up to 750°C, three steps of weight loss are observed. The steps are associated with the decomposition of PVA and adsorbed water, while above 750°C, contentious weight loss is attributed to the decomposition of the MWNTs and residues of the polymer. The data is presented in Table S2.

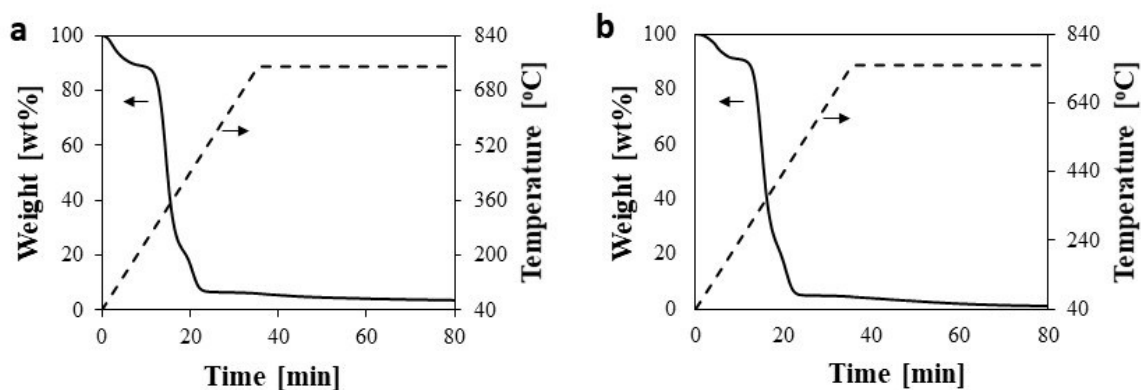

**Figure S7.** TGA curves of dried dispersions of MWNTs-INP (1 mg/ml) in (a) 1 wt% PVA10-80 in 50 vol% EtOH, (b) 5 wt% PVA10-80 in 50 vol% EtOH. The dashed curves designate weight loss as a function of temperature, and the contentious line weight loss as a function of time.

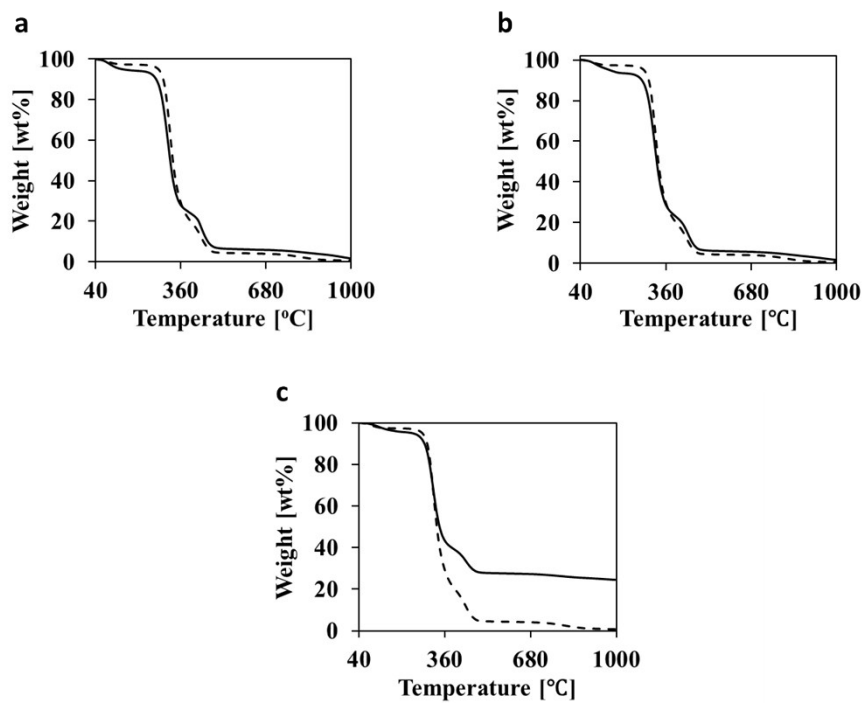

**Figure S8.** TGA curves of dried dispersions of MWNTs-NTX4 (1 mg/ml) in (a) 1 wt% PVA10-80 in 10 vol% EtOH, (b) 1 wt% PVA10-80 in 50 vol% EtOH, and (c) 5 wt% PVA10-80 in 50 vol% EtOH. The TGA curve of PVA10-80 appears as a dashed curve.

**Carbon Black (CB) samples:** The thermal decomposition of CB dispersion was investigated. Powder mixtures of PVA/CB were investigated to provide a reference (Figure S9 a). We evaluated the mass fraction of CB in the dispersion by subtracting the weight percent of pure PVA from the dispersion thermogram curve at 750°C (Figure S9b), obtaining the weight percent of the CB in the PVA-CB dispersion, following a procedure outlined in the literature<sup>3</sup>.

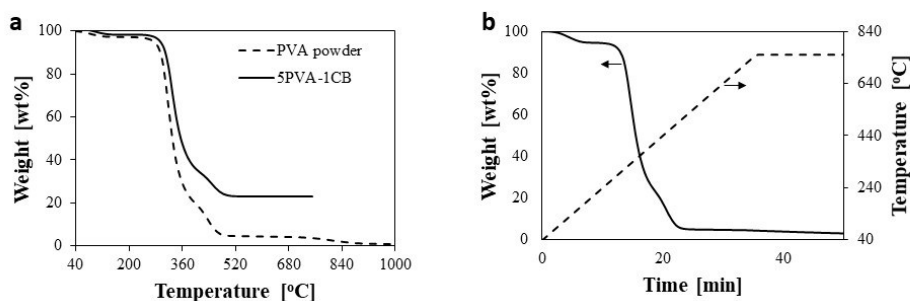

**Figure S9.** TGA curves of CB (a) a mixture of PVA10-80:CB powders at 5:1 mass ratio (b) dried dispersions of CB (1 mg/ml) in 5wt% PVA10-80 in water. The dashed curves designate weight loss as a function of temperature, and the contentious line weight loss as a function of time.

**Table S2: Calculated weight fraction of CNTs and CB in PVA dispersions**

| Sample description                      | Weight fraction of NP [wt%] |
|-----------------------------------------|-----------------------------|
| MWNTs-NTX4, 1wt% PVA10-80, 10 vol% EtOH | 1%                          |
| MWNTs-NTX4, 1wt%PVA10-80, 50 vol% EtOH  | 1%                          |
| MWNTs-NTX4, 5wt%PVA10-80, 50 vol% EtOH  | 18%                         |
| MWNTs-INP, 1wt%PVA10-80, 50 vol% EtOH   | 2%                          |

|                                       |    |
|---------------------------------------|----|
| MWNTs-INP, 5wt%PVA10-80, 50 vol% EtOH | 4% |
| CB, 5wt%PVA10-80, water               | 1% |

## References

1. Kim J.H.; Lee S.; M.; H.; W.S.; Jeong H.J.; J.R.; J.T.; S.K.; Three-Dimensional Printing of Highly Conductive Carbon Nanotube Microarchitectures. *ACS Nano*, **2016**, 10, 8879–8887.
2. Frone A.N.; Panaitescu D.M.; Donescu D.; Spataru C.I.; Radovici C.; Trusca R.; Somoghi R.; Preparation and Characterization of PVA Composites with Cellulose Nanofibers Obtained by Ultrasonication. *BioResources*. **2011**, 6, 487-512.
3. Reddy K.R.; Sina B.C.; Ryua K.S.; Nohb J.; Leea Y.; In situ self-organization of carbon black–polyaniline composites from nanospheres to nanorods: Synthesis, morphology, structure and electrical conductivity. *Synth.Meth.* **2009**, 159, 1934–1939.
